# Supplementary material for: BNT162b2 XBB1.5-adapted Vaccine and COVID-19 Hospital Admissions and Ambulatory Visits in US Adults
Source: bioRxiv or medRxiv preprint supplement (doi:10.1101/2023.12.24.23300512), 2023-12-28
Supplement: Supplementary file [file media-1.pdf]

**Supplementary Appendix for**  
**BNT162b2 XBB1.5-adapted Vaccine and COVID-19 Hospital Admissions and Ambulatory**  
**Visits in US Adults**

Sara Y. Tartof, PhD; Jeff M. Slezak, MS; Timothy B. Frankland, MA; Laura Puzniak, PhD;

Vennis Hong, MPH; Bradley K. Ackerson, MD; Julie A Stern, MPH ; Sarah Simmons;

Luis Jodar, PhD; John M. McLaughlin, PhD

Supplement

**Table S1.** Acute Respiratory Infection Codes, October 10, 2023 through December 10, 2023

|        |                                                              |
|--------|--------------------------------------------------------------|
| A48.1  | LEGIONNAIRES' DISEASE                                        |
| B34.2  | CORONAVIRUS INFECTION, UNSPECIFIED                           |
| B44.0  | INVASIVE PULMONARY ASPERGILLOSIS                             |
| B97.29 | OTH CORONAVIRUS AS THE CAUSE OF DISEASES CLASSD ELSWHR       |
| J00    | ACUTE NASOPHARYNGITIS (COMMON COLD)                          |
| J01.00 | ACUTE MAXILLARY SINUSITIS, UNSPECIFIED                       |
| J01.10 | ACUTE FRONTAL SINUSITIS, UNSPECIFIED                         |
| J01.20 | ACUTE ETHMOIDAL SINUSITIS, UNSPECIFIED                       |
| J01.30 | ACUTE SPHENOIDAL SINUSITIS, UNSPECIFIED                      |
| J01.40 | ACUTE PANSINUSITIS, UNSPECIFIED                              |
| J01.80 | OTHER ACUTE SINUSITIS                                        |
| J01.90 | ACUTE SINUSITIS, UNSPECIFIED                                 |
| J02.0  | STREPTOCOCCAL PHARYNGITIS                                    |
| J02.8  | ACUTE PHARYNGITIS DUE TO OTHER SPECIFIED ORGANISMS           |
| J02.9  | ACUTE PHARYNGITIS, UNSPECIFIED                               |
| J03.00 | ACUTE STREPTOCOCCAL TONSILLITIS, UNSPECIFIED                 |
| J03.90 | ACUTE TONSILLITIS, UNSPECIFIED                               |
| J04.0  | ACUTE LARYNGITIS                                             |
| J04.10 | ACUTE TRACHEITIS WITHOUT OBSTRUCTION                         |
| J05.0  | ACUTE OBSTRUCTIVE LARYNGITIS (CROUP)                         |
| J05.10 | ACUTE EPIGLOTTITIS WITHOUT OBSTRUCTION                       |
| J06.0  | ACUTE LARYNGOPHARYNGITIS                                     |
| J06.9  | ACUTE UPPER RESPIRATORY INFECTION, UNSPECIFIED               |
| J09.X1 | INFLUENZA DUE TO IDENT NOVEL INFLUENZA A VIRUS W PNEUMONIA   |
| J09.X2 | FLU DUE TO IDENT NOVEL INFLUENZA A VIRUS W OTH RESP MANIFEST |
| J10.00 | FLU DUE TO OTH IDENT FLU VIRUS W UNSP TYPE OF PNEUMONIA      |
| J10.01 | FLU DUE TO OTH IDENT FLU VIRUS W SAME OTH IDENT FLU VIRUS PN |
| J10.08 | INFLUENZA DUE TO OTH IDENT INFLUENZA VIRUS W OTH PNEUMONIA   |
| J10.1  | FLU DUE TO OTH IDENT INFLUENZA VIRUS W OTH RESP MANIFEST     |
| J10.2  | INFLUENZA DUE TO OTH IDENT INFLUENZA VIRUS W GI MANIFEST     |
| J11.00 | FLU DUE TO UNIDENTIFIED FLU VIRUS W UNSP TYPE OF PNEUMONIA   |
| J11.08 | FLU DUE TO UNIDENTIFIED FLU VIRUS W SPECIFIED PNEUMONIA      |
| J11.1  | FLU DUE TO UNIDENTIFIED INFLUENZA VIRUS W OTH RESP MANIFEST  |
| J12.1  | RESPIRATORY SYNCYTIAL VIRUS PNEUMONIA                        |
| J12.2  | PARAINFLUENZA VIRUS PNEUMONIA                                |
| J12.3  | HUMAN METAPNEUMOVIRUS PNEUMONIA                              |
| J12.81 | PNEUMONIA DUE TO SARS-ASSOCIATED CORONAVIRUS                 |

|         |                                                              |
|---------|--------------------------------------------------------------|
| J12.82  | PNEUMONIA DUE TO CORONAVIRUS DISEASE 2019                    |
| J12.89  | OTHER VIRAL PNEUMONIA                                        |
| J12.9   | VIRAL PNEUMONIA, UNSPECIFIED                                 |
| J13     | PNEUMONIA DUE TO STREPTOCOCCUS PNEUMONIAE                    |
| J14     | PNEUMONIA DUE TO HEMOPHILUS INFLUENZAE                       |
| J15.0   | PNEUMONIA DUE TO KLEBSIELLA PNEUMONIAE                       |
| J15.1   | PNEUMONIA DUE TO PSEUDOMONAS                                 |
| J15.20  | PNEUMONIA DUE TO STAPHYLOCOCCUS, UNSPECIFIED                 |
| J15.211 | PNEUMONIA DUE TO METHICILLIN SUSCEP STAPH                    |
| J15.212 | PNEUMONIA DUE TO METHICILLIN RESISTANT STAPHYLOCOCCUS AUREUS |
| J15.4   | PNEUMONIA DUE TO OTHER STREPTOCOCCI                          |
| J15.5   | PNEUMONIA DUE TO ESCHERICHIA COLI                            |
| J15.6   | PNEUMONIA DUE TO OTHER AEROBIC GRAM-NEGATIVE BACTERIA        |
| J15.7   | PNEUMONIA DUE TO MYCOPLASMA PNEUMONIAE                       |
| J15.8   | PNEUMONIA DUE TO OTHER SPECIFIED BACTERIA                    |
| J15.9   | UNSPECIFIED BACTERIAL PNEUMONIA                              |
| J16.8   | PNEUMONIA DUE TO OTHER SPECIFIED INFECTIOUS ORGANISMS        |
| J18.0   | BRONCHOPNEUMONIA, UNSPECIFIED ORGANISM                       |
| J18.1   | LOBAR PNEUMONIA, UNSPECIFIED ORGANISM                        |
| J18.8   | OTHER PNEUMONIA, UNSPECIFIED ORGANISM                        |
| J18.9   | PNEUMONIA, UNSPECIFIED ORGANISM                              |
| J20.2   | ACUTE BRONCHITIS DUE TO STREPTOCOCCUS                        |
| J20.5   | ACUTE BRONCHITIS DUE TO RESPIRATORY SYNCYTIAL VIRUS          |
| J20.6   | ACUTE BRONCHITIS DUE TO RHINOVIRUS                           |
| J20.8   | ACUTE BRONCHITIS DUE TO OTHER SPECIFIED ORGANISMS            |
| J20.9   | ACUTE BRONCHITIS, UNSPECIFIED                                |
| J22     | UNSPECIFIED ACUTE LOWER RESPIRATORY INFECTION                |
| J39.0   | RETROPHARYNGEAL AND PARAPHARYNGEAL ABSCESS                   |
| J39.1   | OTHER ABSCESS OF PHARYNX                                     |
| J39.2   | OTHER DISEASES OF PHARYNX                                    |
| J39.8   | OTHER SPECIFIED DISEASES OF UPPER RESPIRATORY TRACT          |
| J80     | ACUTE RESPIRATORY DISTRESS SYNDROME                          |
| J96.00  | ACUTE RESPIRATORY FAILURE, UNSP W HYPOXIA OR HYPERCAPNIA     |
| J96.01  | ACUTE RESPIRATORY FAILURE WITH HYPOXIA                       |
| J96.02  | ACUTE RESPIRATORY FAILURE WITH HYPERCAPNIA                   |
| J96.10  | CHRONIC RESPIRATORY FAILURE, UNSP W HYPOXIA OR HYPERCAPNIA   |
| J96.11  | CHRONIC RESPIRATORY FAILURE WITH HYPOXIA                     |
| J96.12  | CHRONIC RESPIRATORY FAILURE WITH HYPERCAPNIA                 |
| J96.20  | ACUTE AND CHR RESP FAILURE, UNSP W HYPOXIA OR HYPERCAPNIA    |
| J96.21  | ACUTE AND CHRONIC RESPIRATORY FAILURE WITH HYPOXIA           |
| J96.22  | ACUTE AND CHRONIC RESPIRATORY FAILURE WITH HYPERCAPNIA       |

|        |                                                          |
|--------|----------------------------------------------------------|
| J96.90 | RESPIRATORY FAILURE, UNSP, UNSP W HYPOXIA OR HYPERCAPNIA |
| J96.91 | RESPIRATORY FAILURE, UNSPECIFIED WITH HYPOXIA            |
| J96.92 | RESPIRATORY FAILURE, UNSPECIFIED WITH HYPERCAPNIA        |
| M35.81 | MULTISYSTEM INFLAMATORY SYNDROME                         |
| M35.89 | OTHER SPECIFIED SYSTEMIC INVOLVMENT OF CONNECTIVE TISSUE |
| R05.1  | ACUTE COUGH                                              |
| R05.3  | CHRONIC COUGH                                            |
| R05.4  | COUGH SYNCOPE                                            |
| R05.8  | OTHER SPECIFIED COUGH                                    |
| R05.9  | COUGH, UNSPECIFIED                                       |
| R09.2  | RESPIRATORY ARREST                                       |
| R50.9  | FEVER, UNSPECIFIED                                       |
| U07.1  | COVID-19                                                 |

## Approach to medical chart review validation of hospital admissions

### Summary

Chart reviews focused on the elimination of hospitalizations that are clearly not for COVID-19 from analysis (e.g., hospitalizations with incidental SARS-CoV-2 infection that did not contribute to the need for hospitalization and, therefore, do not reflect severe COVID-19 disease). Extensive chart review is not required in most cases.

Most cases are clearly for COVID-19 or for another etiology with only incidental SARS-CoV-2 infection. Therefore, most chart reviews can be limited to:

- 1.) Discharge summary and/or
- 2.) ED note, Admission H&P

However, some cases require more nuanced review and are referred to the MD co-investigator for more detailed review.

- 3.) Discharge summary
- 4.) ED note, Admission H&P
- 5.) Progress notes in limited number of cases
- 6.) Nursing and other notes in rare cases

### Definitions

#### 1.) Clearly COVID-19 associated:

- a. severe respiratory illness [e.g., acute hypoxemic respiratory failure], severe vomiting and/or diarrhea, or very poor intake with dehydration associated with severe electrolyte disturbance, AKI etc resulting in admission and SARS-CoV-2 positive)

#### 2.) Possibly or likely COVID-19 associated admission:

- a. Thromboembolic event (stroke, AMI, PE, DVT) during or shortly after SARS-CoV-2 infection: possible versus likely depends on presence or absence of predisposing

comorbidities (eg., history of stroke, AMI, PE, diabetes, smoking, BCP, etc) and member characteristics (e.g., age)

- b. Cardiac dysrhythmia during or shortly after SARS-CoV-2 infection: probability depends on prior history of dysrhythmia, dysrhythmia-free interval prior to admission, etc.
- c. Members infected with SARS-CoV-2 and another respiratory pathogen that may be associated with similar symptoms may be COVID-19 associated since it is not possible to determine the relative contribution of each pathogen to the symptoms.

**3.) Unlikely COVID-19 associated:**

- a. incidentally SARS-CoV-2 positive admitted for an unrelated reason (e.g., L&D, elective surgery, bacterial infection such as abscess, cellulitis, etc) without evidence of COVID-19 associated symptoms that would have resulted in admission
- b. admitted for a condition that may be COVID-19 associated (e.g., stroke, cardiac dysrhythmia) but has history of frequent strokes, underlying dysrhythmia, make it less likely that the admission is COVID-19 associated.

**Table S2. Risk of COVID-19 outcome among those who received a BNT162b2 XBB1.5-adapted vaccine by comparison and age group among adults ≥18 years of age**

| Comparison (reference) and age groups                                                                                                                | Hospitalization                      | ED/UC encounter  | Outpatient visit |
|------------------------------------------------------------------------------------------------------------------------------------------------------|--------------------------------------|------------------|------------------|
|                                                                                                                                                      | <i>Adjusted Odds ratio (95% CI)*</i> |                  |                  |
| No XBB1.5-adapted vaccine                                                                                                                            |                                      |                  |                  |
| ≥18 years                                                                                                                                            | 0.37 (0.20–0.67)                     | 0.42 (0.34–0.53) | 0.42 (0.27–0.66) |
| 18-64 years                                                                                                                                          | 0.32 (0.04–2.48)                     | 0.36 (0.24–0.54) | 0.68 (0.46–1.01) |
| ≥65 years                                                                                                                                            | 0.37 (0.20–0.69)                     | 0.45 (0.34–0.59) | 0.32 (0.21–0.51) |
| BA.4/5-adapted bivalent vaccine but no XBB1.5-adapted vaccine                                                                                        |                                      |                  |                  |
| ≥18 years                                                                                                                                            | 0.40 (0.21–0.75)                     | 0.43 (0.34–0.55) | 0.49 (0.35–0.68) |
| 18-64 years                                                                                                                                          | 0.35 (0.04–2.99)                     | 0.40 (0.26–0.62) | 0.78 (0.50–1.21) |
| ≥65 years                                                                                                                                            | 0.39 (0.20–0.76)                     | 0.43 (0.31–0.58) | 0.29 (0.18–0.47) |
| ≥3 doses of wild-type vaccine but no variant-adapted vaccines of any kind (e.g., XBB1.5-adapted or BA.4/5-adapted or BA.1-adapted bivalent vaccines) |                                      |                  |                  |
| ≥18 years                                                                                                                                            | 0.36 (0.20–0.65)                     | 0.41 (0.33–0.51) | 0.44 (0.33–0.60) |
| 18-64 years                                                                                                                                          | 0.27 (0.03–2.14)                     | 0.34 (0.23–0.51) | 0.60 (0.40–0.90) |
| ≥65 years                                                                                                                                            | 0.36 (0.19–0.68)                     | 0.45 (0.34–0.60) | 0.35 (0.22–0.55) |
| ≥2 doses of wild-type vaccine but no variant-adapted vaccines of any kind (e.g., XBB1.5-adapted or BA.4/5-adapted or BA.1-adapted bivalent vaccines) |                                      |                  |                  |
| ≥18 years                                                                                                                                            | 0.37 (0.20–0.67)                     | 0.42 (0.33–0.52) | 0.46 (0.34–0.62) |
| 18-64 years                                                                                                                                          | 0.30 (0.04–2.32)                     | 0.35 (0.23–0.52) | 0.65 (0.43–0.97) |
| ≥65 years                                                                                                                                            | 0.37 (0.20–0.70)                     | 0.46 (0.35–0.61) | 0.33 (0.21–0.53) |
| Unvaccinated                                                                                                                                         |                                      |                  |                  |
| ≥18 years                                                                                                                                            | 0.32 (0.16–0.64)                     | 0.40 (0.31–0.52) | 0.57 (0.39–0.84) |
| 18-64 years                                                                                                                                          | 0.37 (0.04–3.22)                     | 0.37 (0.24–0.56) | 0.83 (0.52–1.33) |
| ≥65 years                                                                                                                                            | 0.29 (0.14–0.61)                     | 0.33 (0.22–0.49) | 0.40 (0.18–0.87) |

\*Models adjusted for week of encounter, age, sex, self-reported race/ethnicity, BMI, Charlson comorbidity index, prior SARS-CoV-2 infection, and utilization history (flu and pneumococcal vaccination, inpatient, ED, and outpatient encounters in prior year). BMI not included in hospitalization models for age <65 due to convergence issues.

**Table S3. Risk of COVID-19 outcome among those who received only prior (non-XBB1.5-adapted) vaccine doses compared to the unvaccinated among adults ≥18 years of age, by age group**

| COVID-19 vaccination status (vs unvaccinated)                                                                                                                 | Hospitalization                      | ED/UC encounter  | Outpatient visit |
|---------------------------------------------------------------------------------------------------------------------------------------------------------------|--------------------------------------|------------------|------------------|
|                                                                                                                                                               | <i>Adjusted Odds ratio (95% CI)*</i> |                  |                  |
| BA.4/5-adapted bivalent vaccine but no XBB1.5-adapted vaccine                                                                                                 |                                      |                  |                  |
| ≥18 years                                                                                                                                                     | 0.78 (0.50–1.20)                     | 0.92 (0.76–1.10) | 1.18 (0.88–1.56) |
| 18-64 years                                                                                                                                                   | 1.08 (0.41–2.90)                     | 0.90 (0.72–1.13) | 1.01 (0.73–1.41) |
| ≥65 years                                                                                                                                                     | 0.71 (0.43–1.17)                     | 0.77 (0.56–1.08) | 1.42 (0.71–2.83) |
| ≥3 doses of original wild-type vaccine but no variant-adapted vaccines of any kind (e.g., XBB1.5-adapted or BA.4/5-adapted or BA.1-adapted bivalent vaccines) |                                      |                  |                  |
| ≥18 years                                                                                                                                                     | 0.89 (0.61–1.32)                     | 0.98 (0.84–1.14) | 1.36 (1.06–1.74) |
| 18-64 years                                                                                                                                                   | 1.34 (0.60–3.01)                     | 1.07 (0.89–1.27) | 1.38 (1.06–1.81) |
| ≥65 years                                                                                                                                                     | 0.79 (0.50–1.24)                     | 0.73 (0.54–0.99) | 1.15 (0.59–2.24) |
| ≥2 doses of wild-type vaccine but no variant-adapted vaccines of any kind (e.g., XBB1.5-adapted or BA.4/5-adapted or BA.1-adapted bivalent vaccines)          |                                      |                  |                  |
| ≥18 years                                                                                                                                                     | 0.84 (0.57–1.22)                     | 0.96 (0.83–1.11) | 1.24 (0.98–1.58) |
| 18-64 years                                                                                                                                                   | 1.21 (0.56–2.63)                     | 1.04 (0.88–1.22) | 1.22 (0.94–1.59) |
| ≥65 years                                                                                                                                                     | 0.74 (0.48–1.15)                     | 0.71 (0.53–0.96) | 1.23 (0.64–2.37) |

\*Models adjusted for week of encounter, age, sex, self-reported race/ethnicity, BMI, Charlson comorbidity index, prior SARS-CoV-2 infection, and utilization history (flu and pneumococcal vaccination, inpatient, ED, and outpatient encounters in prior year). BMI not included in hospitalization models for age <65 due to convergence issues.

**Table S4. Sensitivity analyses of the risk of COVID-19 outcome among those who received a BNT162b2 XBB1.5-adapted vaccine by comparison group among adults  $\geq 18$  years of age, including those who received antiviral or monoclonal antibody treatment\* in the 30 days prior to their COVID-19 encounter**

| Comparison (reference) group                                                                                                                               | Hospitalization                       | ED/UC encounter  | Outpatient visit |
|------------------------------------------------------------------------------------------------------------------------------------------------------------|---------------------------------------|------------------|------------------|
|                                                                                                                                                            | <i>Adjusted Odds ratio (95% CI)**</i> |                  |                  |
| No XBB1.5-adapted vaccine                                                                                                                                  | 0.36 (0.20–0.66)                      | 0.44 (0.37–0.53) | 0.53 (0.41–0.68) |
| BA.4/5-adapted bivalent vaccine but no XBB1.5-adapted vaccine                                                                                              | 0.39 (0.21–0.72)                      | 0.44 (0.36–0.54) | 0.54 (0.41–0.72) |
| $\geq 3$ doses of wild-type vaccine but no variant-adapted vaccines of any kind (e.g., XBB1.5-adapted or BA.4/5-adapted or BA.1-adapted bivalent vaccines) | 0.35 (0.19–0.63)                      | 0.43 (0.36–0.52) | 0.49 (0.38–0.64) |
| $\geq 2$ doses of wild-type vaccine but no variant-adapted vaccines of any kind (e.g., XBB1.5-adapted or BA.4/5-adapted or BA.1-adapted bivalent vaccines) | 0.36 (0.20–0.65)                      | 0.44 (0.36–0.53) | 0.51 (0.39–0.67) |
| Unvaccinated                                                                                                                                               | 0.32 (0.16–0.65)                      | 0.45 (0.36–0.57) | 0.73 (0.52–1.03) |

\* Nirmatrelvir/ritonavir or any other COVID-19 outpatient antiviral or monoclonal antibody (i.e., molnupiravir, remdesivir, bebtelovimab, bamlanivimab, casirivimab, cilgavimab, sotrovimab, tixagevimab)

\*\*Models adjusted for week of encounter, age, sex, self-reported race/ethnicity, BMI, Charlson comorbidity index, prior SARS-CoV-2 infection, and utilization history (flu and pneumococcal vaccination, inpatient, ED, and outpatient encounters in prior year).
